# Supplementary material
Source: PubMed Central journal article supplement (PMC6036223)
Supplement: supp_RA118.003129_136983_1_supp_141501_p939gt.pdf [file supp_RA118.003129_136983_1_supp_141501_p939gt.pdf]

## Supporting Information

### Supplemental Figures

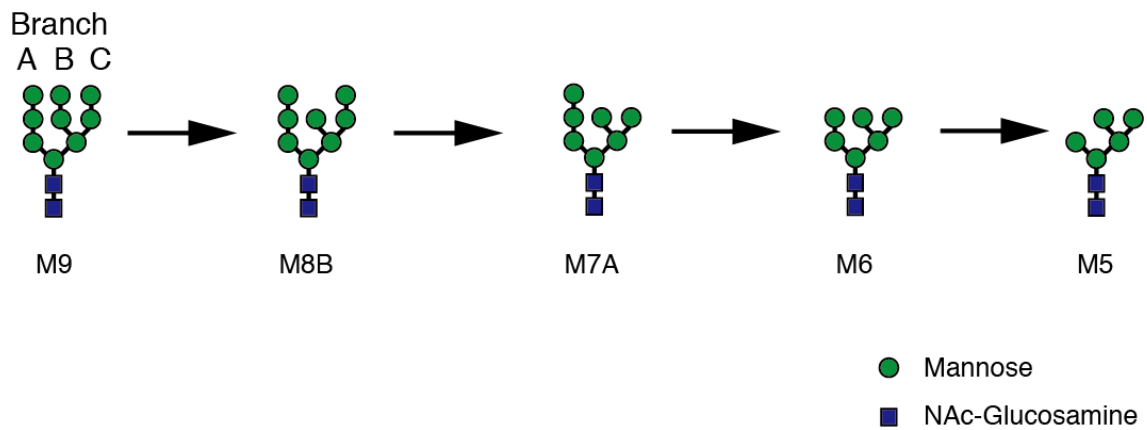

## Suppl Fig. 1

Fig. S1. N-glycan structures

N-glycan structures are presented schematically:  $\text{Man}_9\text{GlcNAc}_2$  (M9),  $\text{Man}_8\text{GlcNAc}_2$  isomer B (M8B),  $\text{Man}_7\text{GlcNAc}_2$  isomer A (M7A),  $\text{Man}_6\text{GlcNAc}_2$  (M6), and  $\text{Man}_5\text{GlcNAc}_2$  (M5).

**A**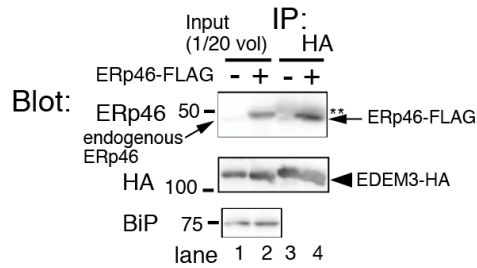**B**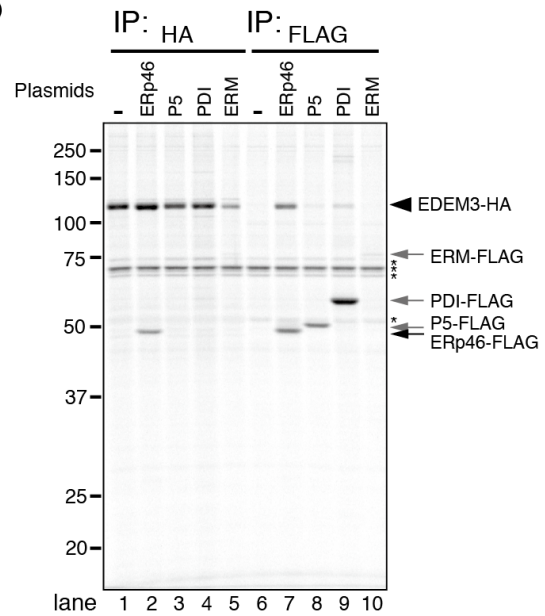

## Suppl Fig. 2

Fig. S2. Association of EDEM3 with ERp46

- (A) EDEM3-HA associates with endogenous ERp46. HEK293 cells were transfected with EDEM3-HA and ERp46-FLAG, and immunoprecipitated using anti-HA antibody. Endogenous ERp46 co-immunoprecipitated with EDEM3-HA.
- (B) Co-immunoprecipitation of ERp46 with EDEM3. HEK293 cells were transfected with EDEM3-HA and FLAG-tagged oxidoreductases (ERp46, P5, and PDI) or ERM, and metabolically labeled for 1 h. Cell lysates were immunoprecipitated with anti-HA or anti-FLAG antibody.

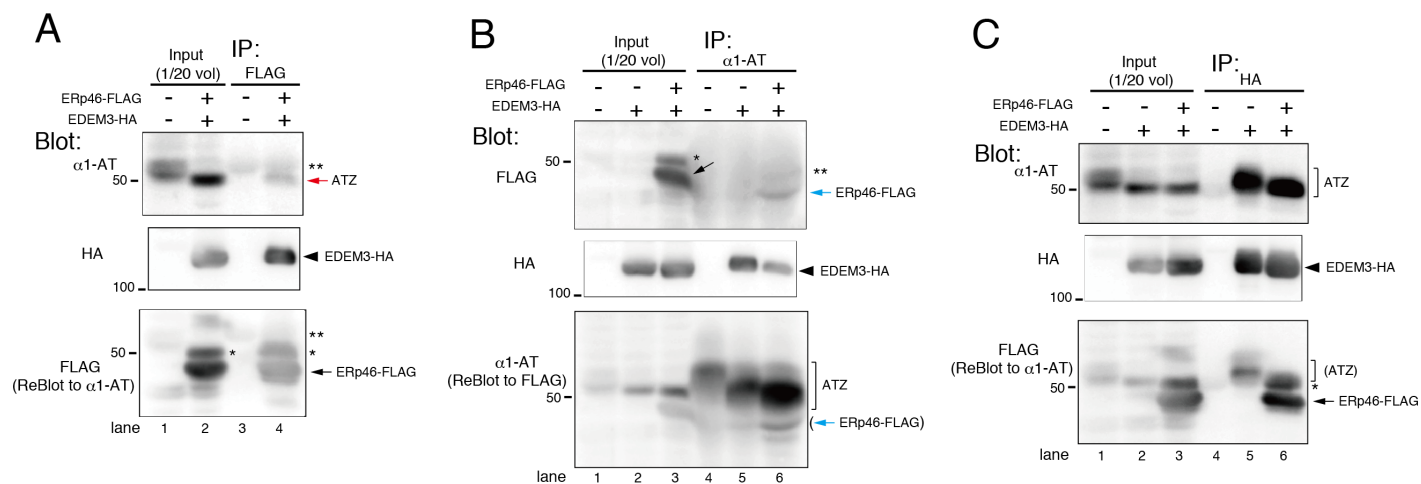

Suppl Fig. 3

Fig. S3. Association of ATZ with EDEM3 and ERp46

HEK293 cells were transfected with ATZ, EDEM3-HA and ERp46, and immunoprecipitated with anti-FLAG antibody (A), anti- $\alpha$ 1-AT antibody (B), or anti-HA antibody (C). ATZ co-immunoprecipitated with ERp46-FLAG was indicated by a red arrow in (A), and ERp46 co-immunoprecipitated with ATZ was shown by a blue arrow in (B). ATZ co-immunoprecipitated with EDEM3-HA was shown by a bracket in (C), and EDEM3-HA co-immunoprecipitated with ATZ was indicated by an arrowhead in (B). Asterisks indicate a signal sometimes detected by the FLAG antibody in cells transfected with ERp46-FLAG, and \*\* indicate immunoglobulin heavy chains used for the precipitation of each proteins.



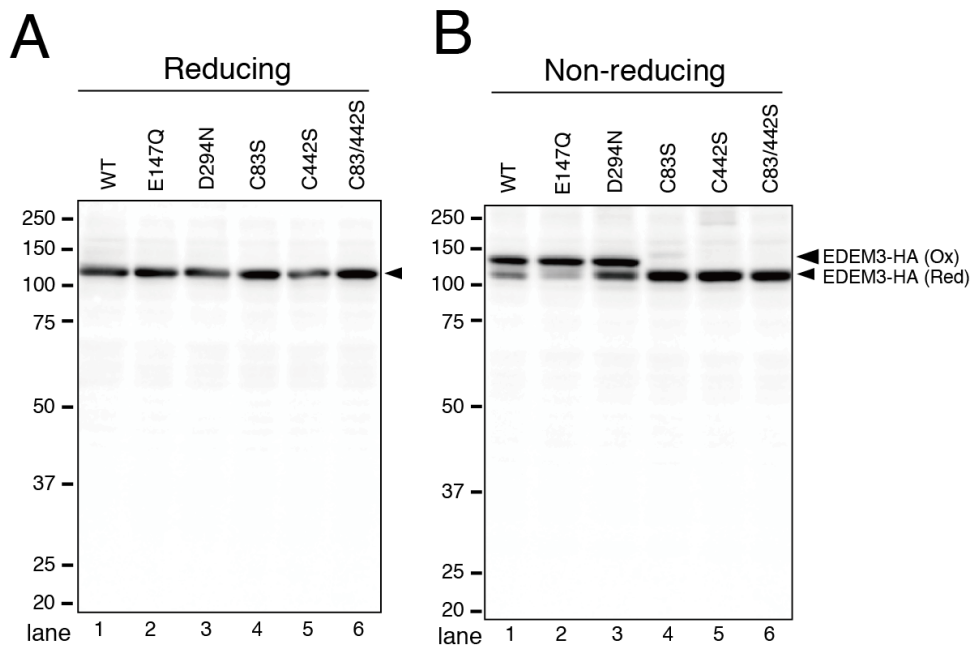

## Suppl Fig. 5

Fig. S5. EDEM3 mutants separated under reducing and non-reducing conditions. EDEM3-HA WT and the indicated mutants were separated by SDS-PAGE under reducing (A) and non-reducing conditions (B).

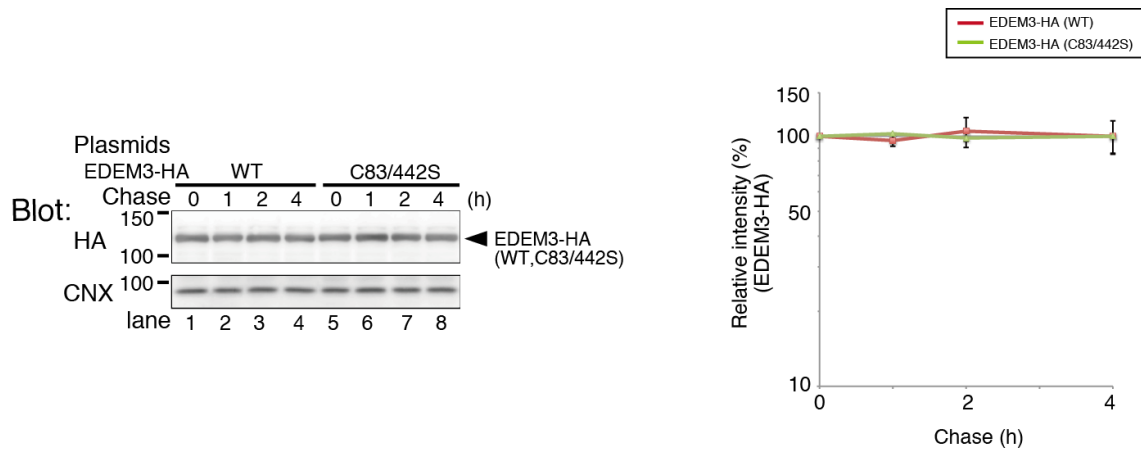

## Suppl Fig. 6

Fig. S6. Stability of WT EDEM3 and its Cys mutant.

HEK293 cells expressing WT EDEM3-HA or C83/442S mutant were treated with 100  $\mu$ M of cycloheximide, and chased for the indicated periods. EDEM3-HA remained in the cells were analyzed by western blotting and quantified (right). Error bars show S.D. of three independent experiments. The differences were statistically not significant (two-tailed Student's *t*-test).

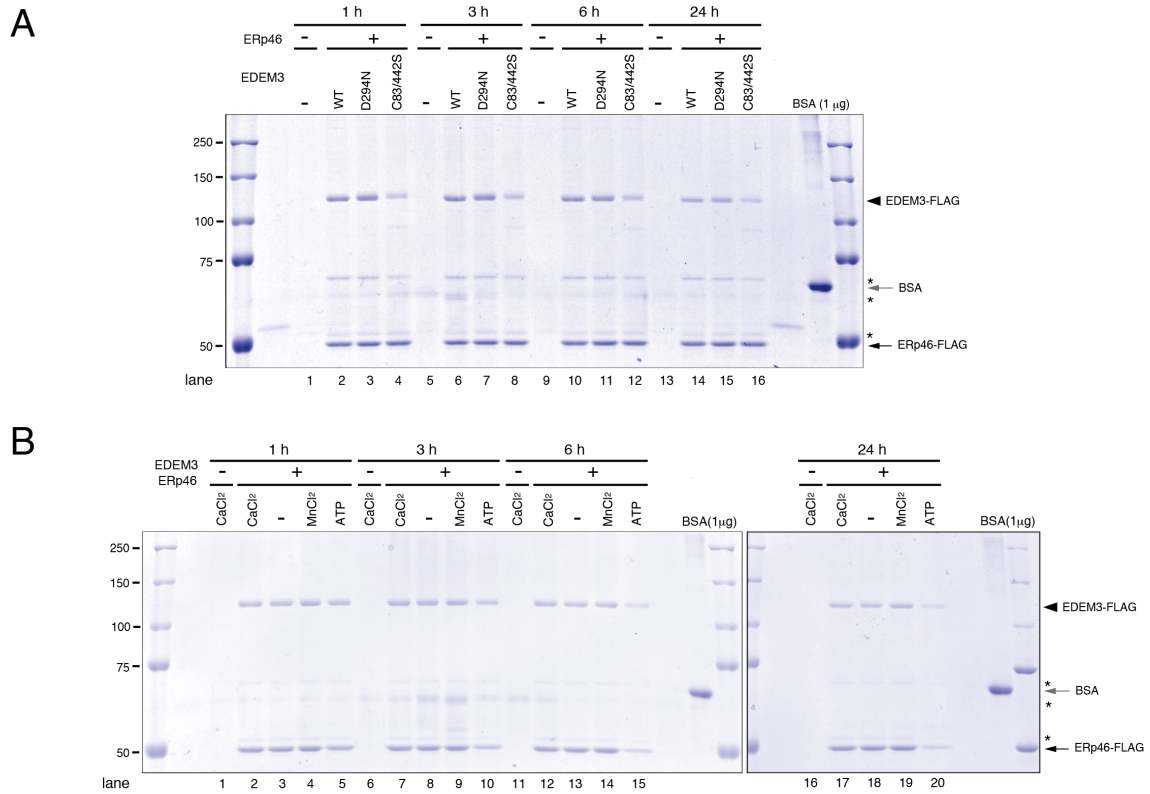

Suppl Fig. 7

Fig. S7. CBB staining of the recombinant EDEM3 and ERp46 proteins used for *in vitro* analysis.

The upper parts of the gel used for the western blot analyses in Fig. 5D (A) and F (B) were stained with CBB.

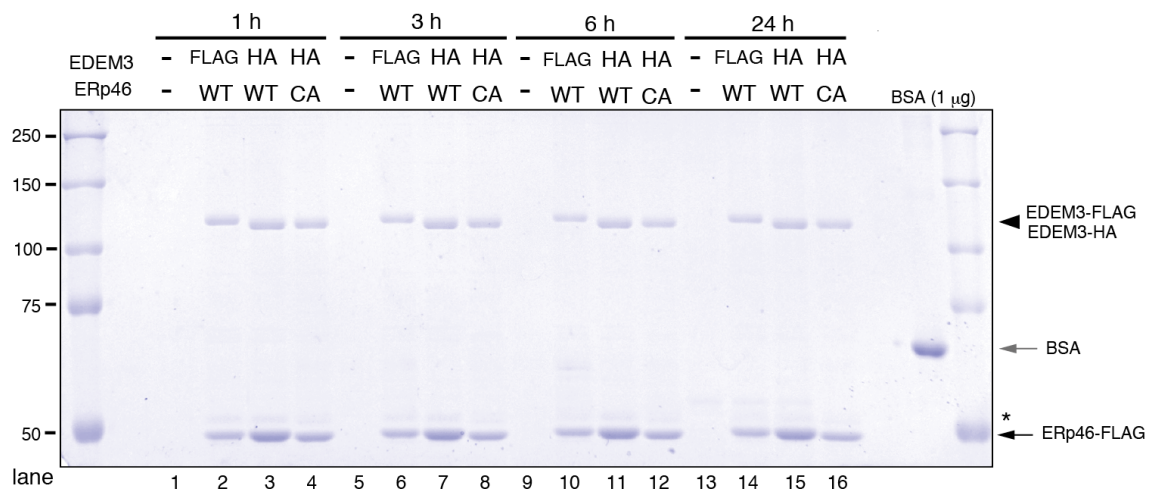

## Suppl Fig. 8

Fig. S8. CBB staining of the recombinant EDEM3 and ERp46 proteins used for *in vitro* analysis.

The upper part of the gel used for the western blot analysis in Fig. 6F was stained with CBB.



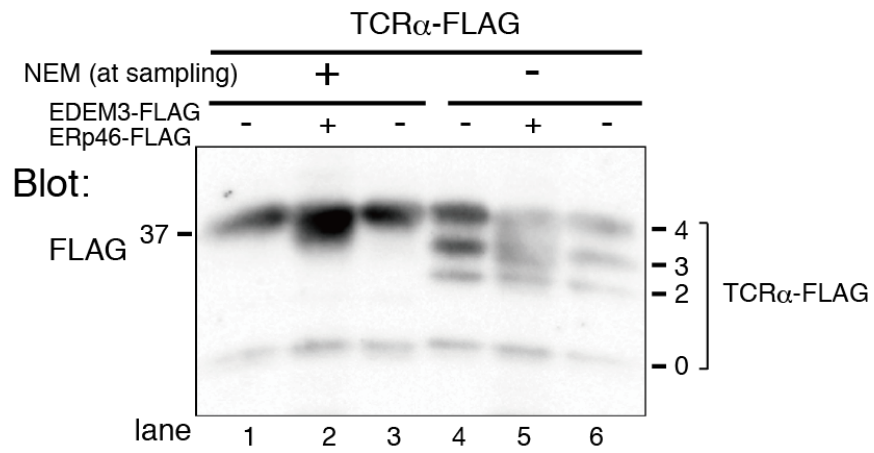

## Suppl Fig. 9

Fig. S9. Mannose trimming from TCR $\alpha$  *in vitro*.

TCR $\alpha$ -FLAG was purified from HEK293 cell lysate in the presence or absence of NEM, and then incubated with co-purified EDEM3 and ERp46 for 24 h. The numerals on the right side indicate the number of N-glycans on TCR $\alpha$ -FLAG.
